# Supplementary material for: Long-term incidence of cancer after index treatment for symptomatic peripheral arterial disease – a health insurance claims data analysis
Source: Atypon-hosted journal article supplement (doi:10.1024/0301-1526/a000901), 2020-08-18
Supplement: 0301-1526_a000901_esm1.pdf [file 0301-1526_a000901_esm1.pdf]

## Electronic Supplementary Material

| <b>Cancer</b>       | <b>ICD-10</b>                                                                                                                     |
|---------------------|-----------------------------------------------------------------------------------------------------------------------------------|
| <i>Breast</i>       | C50                                                                                                                               |
| <i>Colon</i>        | C18, C19, C20                                                                                                                     |
| <i>Bladder</i>      | C67                                                                                                                               |
| <i>Lung</i>         | C33, C34                                                                                                                          |
| <i>Stomach</i>      | C16                                                                                                                               |
| <i>Melanoma</i>     | C43                                                                                                                               |
| <i>Ovaries</i>      | C56                                                                                                                               |
| <i>Pancreas</i>     | C25                                                                                                                               |
| <i>Prostate</i>     | C61                                                                                                                               |
| <i>Uterine</i>      | C54, C55                                                                                                                          |
| <i>Other cancer</i> | C00-C97 (without C44, C77-C79, not included above)                                                                                |
| <b>PAOD</b>         | <b>ICD-10</b>                                                                                                                     |
|                     | Until 2014: I70.21 as primary diagnosis or diabetic foot syndrome <sup>1</sup> as primary and I70.21 as secondary diagnosis       |
| Stage II            | Since 2015: I70.21-22 as primary diagnosis or diabetic foot syndrome <sup>1</sup> as primary and I70.21-22 as secondary diagnosis |
|                     | Until 2014: I70.22 as primary diagnosis or diabetic foot syndrome <sup>1</sup> as primary and I70.22 as secondary diagnosis       |
| Stage III           | Since 2015: I70.23 as primary diagnosis or diabetic foot syndrome <sup>1</sup> as primary and I70.23 as secondary diagnosis       |

Stage IV

Until 2014: I70.23-24 as primary diagnosis or diabetic foot syndrome<sup>1</sup> as primary and I70.23-24 as secondary diagnosis

Since 2015: I70.24-25 as primary diagnosis or diabetic foot syndrome<sup>1</sup> as primary and I70.24-25 as secondary diagnosis

---

**Table I:** ICD codes for cancer types

<sup>1</sup>E1050, E1051, E1150, E1151, L0301, L0302, L0311, L984, I730, I731, I738, I739, I740, I741, I742, I743, I744, I745, I748, I749, E107, E117, R02
